# Supplementary material for: Initial demonstration of microplasma ionization/Orbitrap mass spectrometry for molecular screening of perfluorinated compounds
Source: Royal Society of Chemistry journal article supplement (doi:10.1039/d4ja00157e), 2024-01-01
Supplement: d4ja00157e1.pdf [file d4ja00157e1.pdf]

## Electronic Supplementary Information

for

### Demonstration of Plasma-Ionization Orbitrap Mass Spectrometry for Non-Target Elemental and Molecular Screening of Perfluorinated Compounds

Joseph V. Goodwin<sup>1</sup>, Claudia Masucci<sup>2,3</sup>, Davide Bleiner<sup>2,3</sup>, R. Kenneth Marcus<sup>1\*</sup>

1 Department of Chemistry Clemson University, Clemson, South Carolina, United States

2 Swiss Federal Laboratories for Materials Science and Technology (Empa),  
Überlandstrasse 129, Dübendorf, CH-8600 Switzerland

3 University of Zurich, Winterthurerstrasse 90, Zurich CH 8057 Switzerland

\*Corresponding Author: [marcusr@clemson.edu](mailto:marcusr@clemson.edu)

#### Table Of Contents:

|                                                    |     |
|----------------------------------------------------|-----|
| Figure S1: Mass Spectrum of N-EtFOSE               | S-2 |
| Figure S2: Mass Spectrum of Polyfluoro Acrylates   | S-2 |
| Figure S3: Mass Spectrum of Fluorotelomer Alcohols | S-3 |
| Figure S4: Perfluoro Sulphonamides Linearity Curve | S-4 |
| Figure S5: Polyfluoro Aacrylate Linearity Curve    | S-4 |

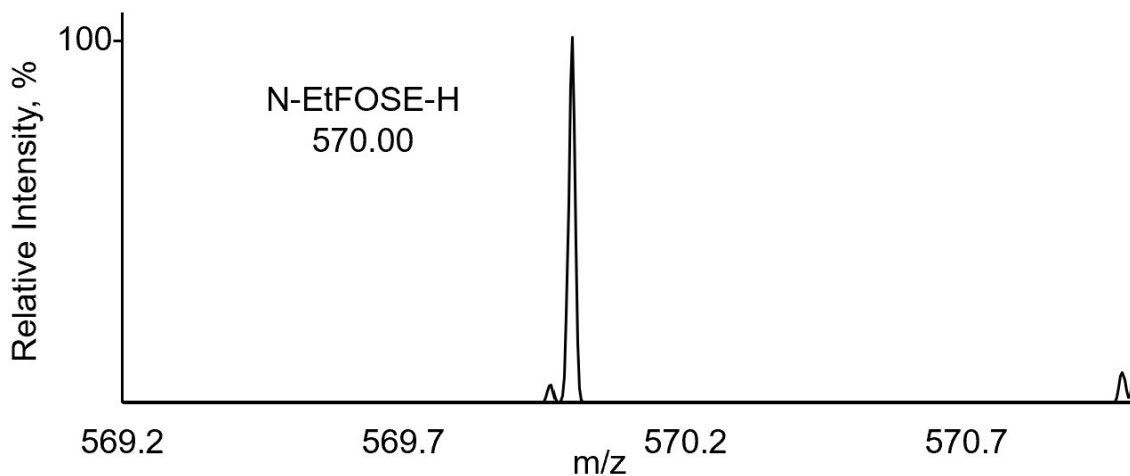

**Figure S1:** Mass spectrum of N-ethyl-N-(2-hydroxyethyl)perfluorooctyl sulphonamide (N-EtFOSE) found from a 20  $\mu\text{L}$  injection of 10  $\mu\text{g mL}^{-1}$  mixture of various PFAS.

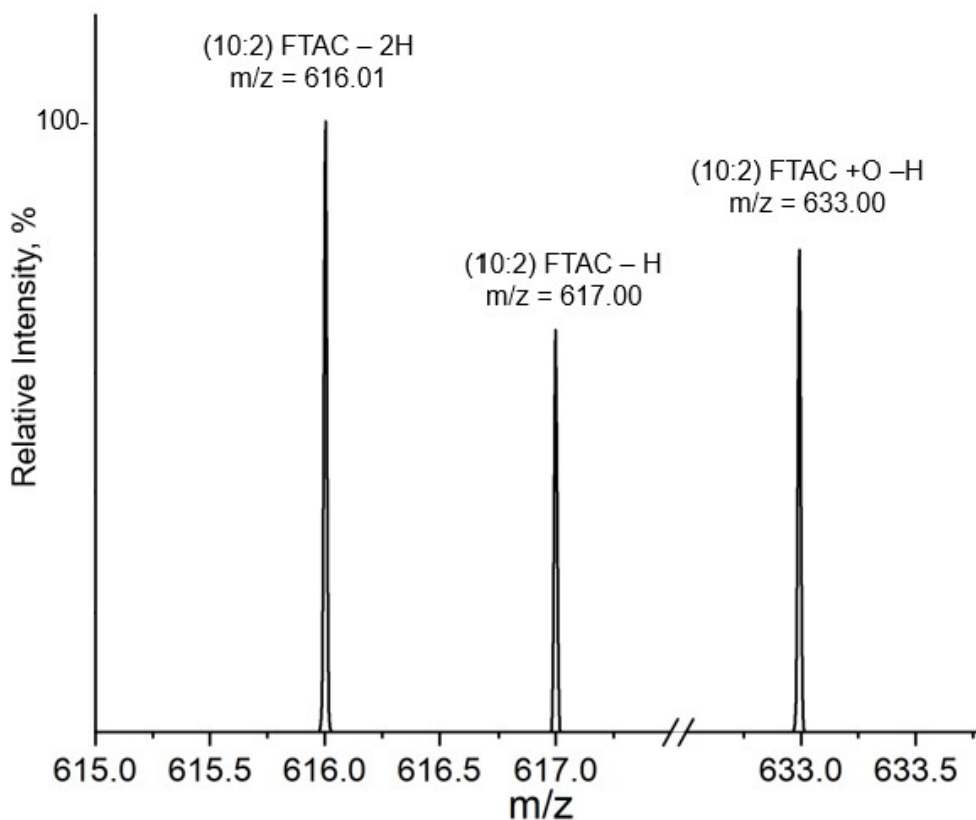

**Figure S2:** Mass spectrum of 1H,1H,2H,2H-perfluoro-n-dodecyl acrylate (10:2 FTAC) found from a 20  $\mu\text{g mL}^{-1}$  injection of 10  $\mu\text{g mL}^{-1}$  mixture of various PFAS.

**Fig**

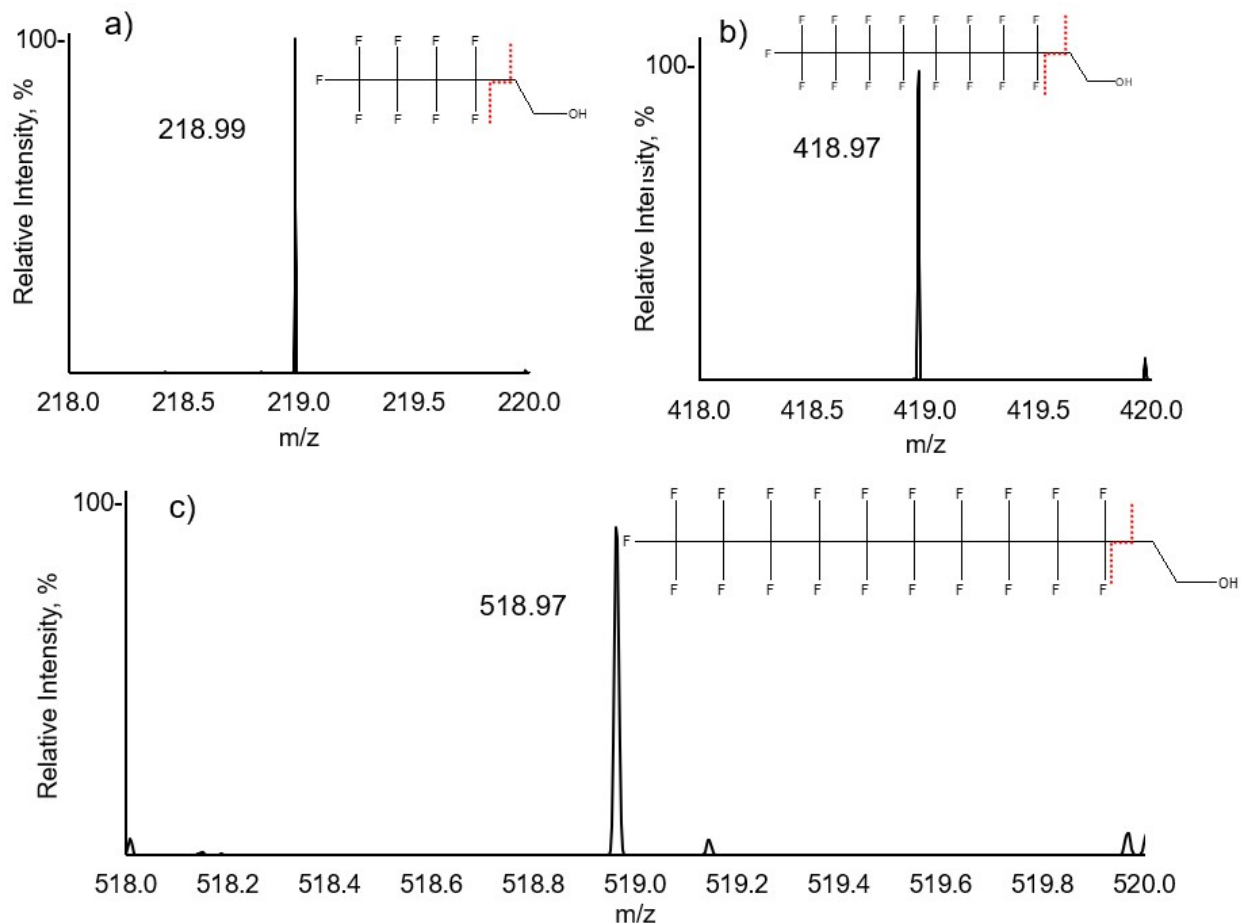

**Figure S3:** Mass spectra of a) 1H,1H,2H,2H-perfluorohexan-1-ol (4:2 FTOH), b) 1H,1H,2H,2H-perfluorodecan-1-ol (8:2 FTOH) and c) 1H,1H,2H,2H-perfluorododecan-1-ol (10:2-FTOH) found from a 20  $\mu\text{L}$  injection of 10  $\mu\text{g mL}^{-1}$  mixture of various PFAS.

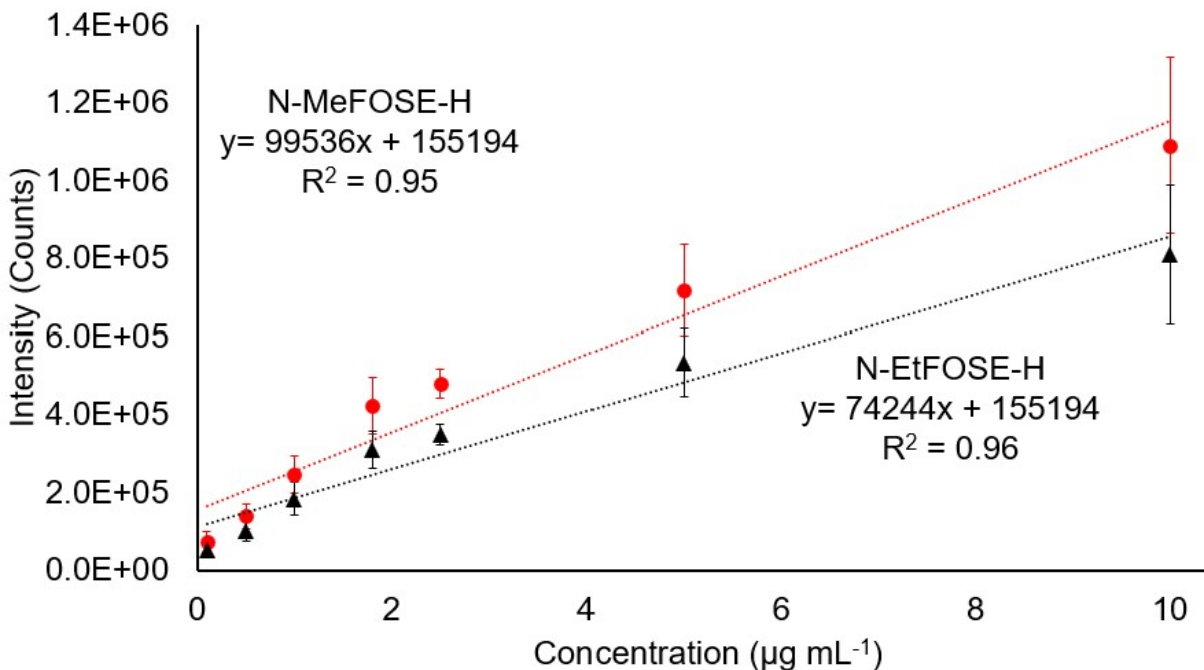

**Figure S4:** Response curves for N-ethyl-N-(2-hydroxyethyl)perfluorooctyl sulphonamide (N-EtFOSE) and N-(2-hydroxyethyl)-N-methylperfluorooctyl sulfonamide (N-MeFOSE) found from a 20 µL injection of a mixture of various PFAS. Concentration ranges from 0.1 to 10 µg mL<sup>-1</sup>.

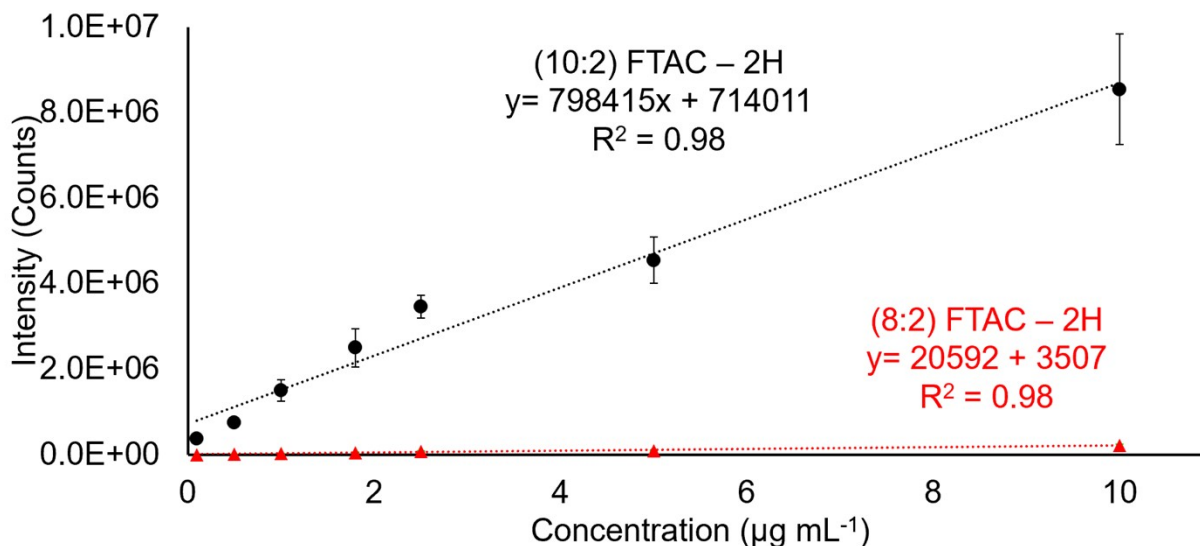

**Figure S5:** Response curves for 1H,1H,2H,2H-perfluoro-n-decyl acrylate (8:2 FTAC) and 1H,1H,2H,2H-perfluoro-n-dodecyl acrylate (10:2 FTAC) found from a 20 µL injection of a mixture of various PFAS. Concentration ranges from 0.1 to 10 µg mL<sup>-1</sup>. 1H,1H,2H,2H-perfluoro-n-octyl acrylate was not plotted due to the low ion counts.
